# Supplementary material
Source: PubMed Central journal article supplement (PMC6071913)

Figure 1a  
Extended Data Figure 1g

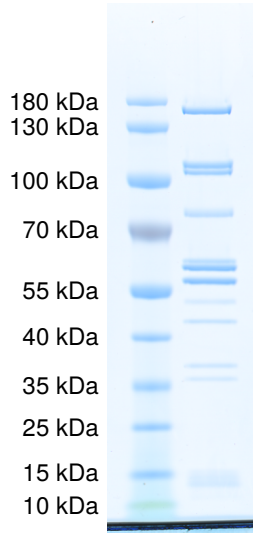

Extended Data Figure 1b

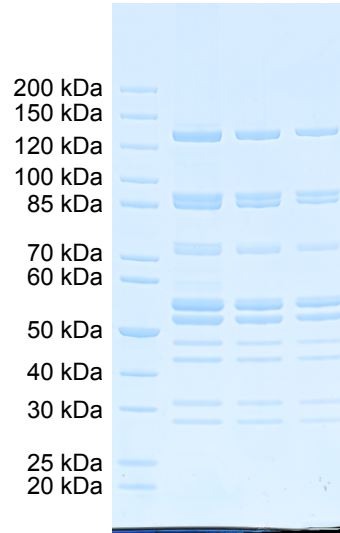

Extended Data Figure 1i

c(INO80) / nM 0 5 10 20 30 40

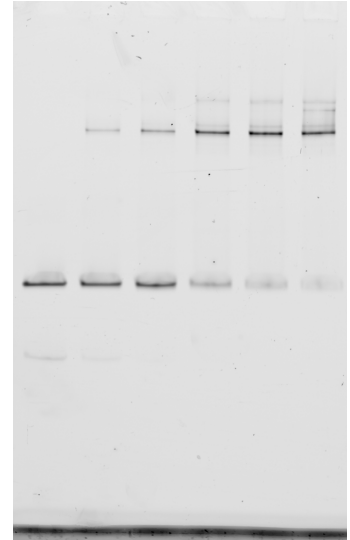

Extended Data Figure 1h  
Extended Data Figure 7b "WT"

t/s 15 30 45 60 120 300 600 1200 -ATP

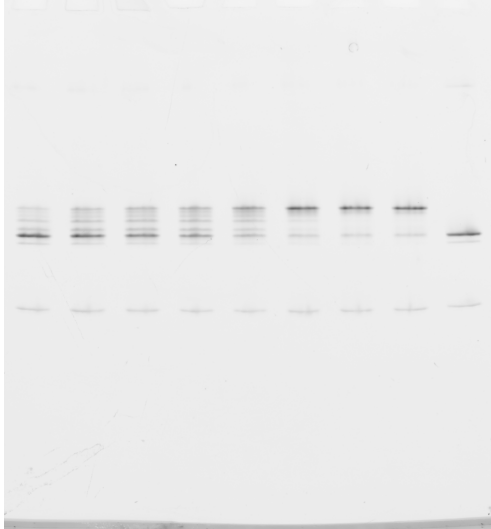

Extended Data Figure 7b "Arp5DBD"

t/s 15 30 45 60 120 300 600 1200 -ATP

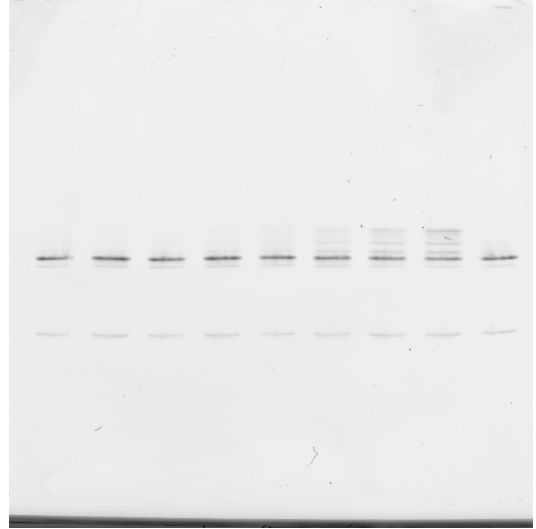

Extended Data Figure 7b "AcPatch"

t/s 15 30 45 60 120 300 600 1200 -ATP

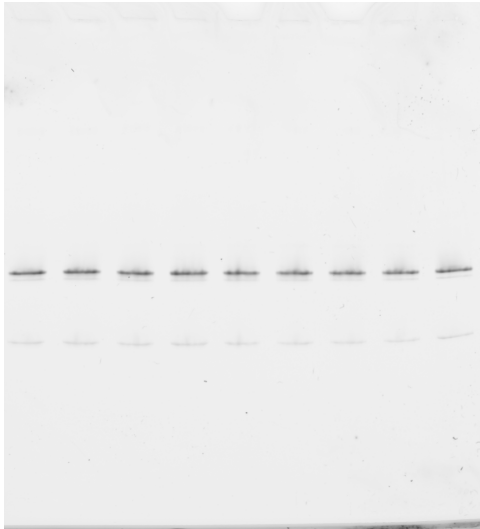

Extended Data Figure 7b "H2mutZ"

t/s 15 30 45 60 120 300 600 1200 -ATP

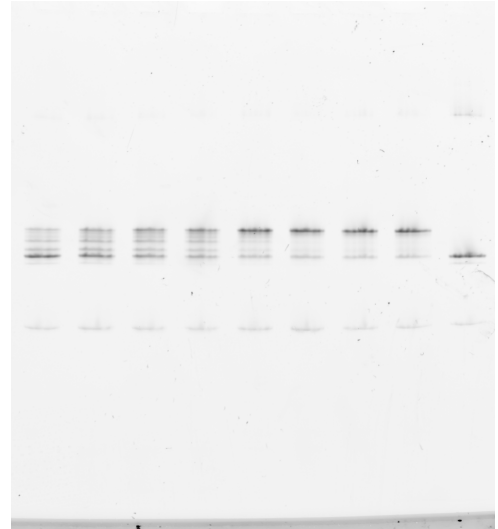

Supplement: NIHMS76254-supplement-Supplementary_Figure_1.pdf [file NIHMS76254-supplement-Supplementary_Figure_1.pdf]
